# Supplementary material
Source: PubMed Central journal article supplement (PMC3295921)

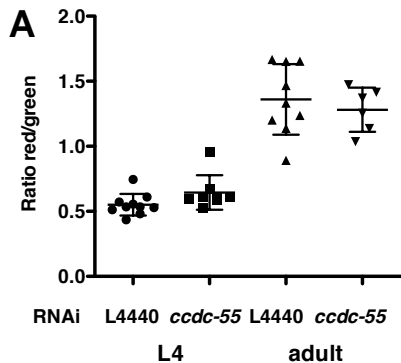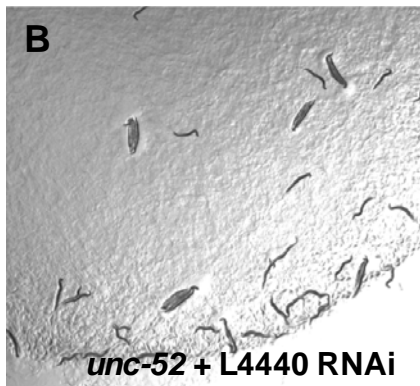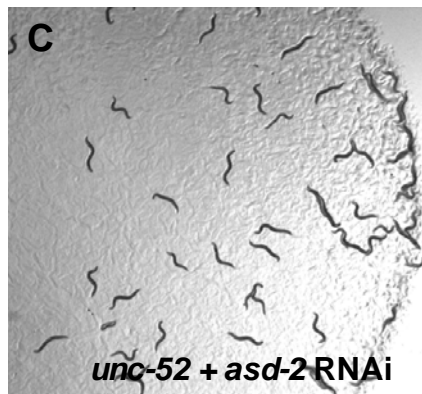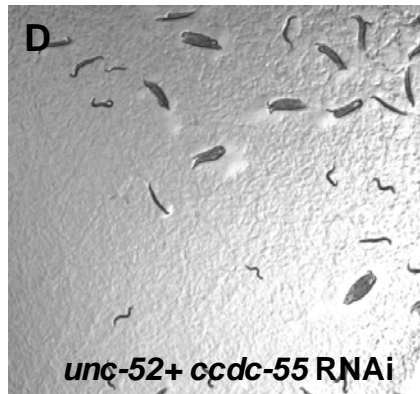

Supplement: NIHMS351420-supplement-01.pdf [file NIHMS351420-supplement-01.pdf]

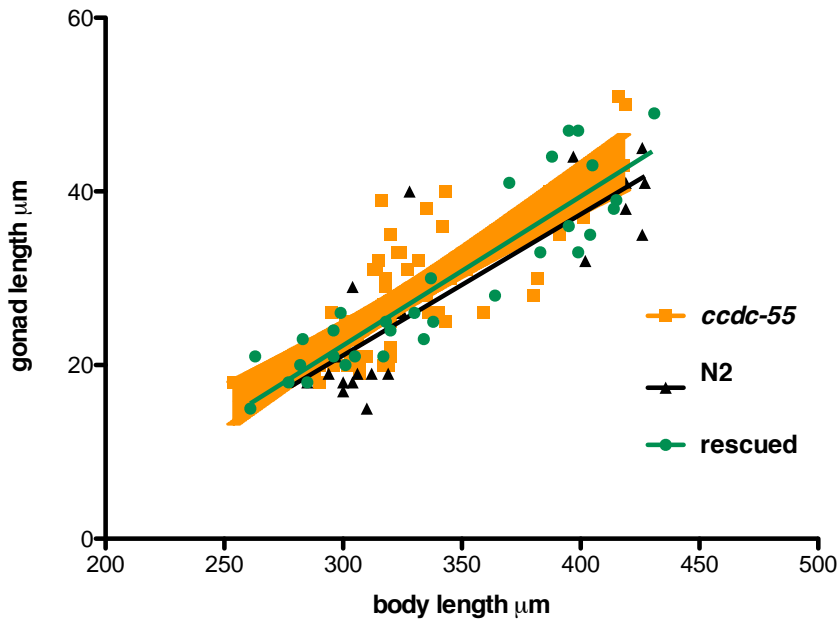

Supplement: NIHMS351420-supplement-02.pdf [file NIHMS351420-supplement-02.pdf]
